# Supplementary material
Source: HighWire-hosted journal article supplement (https://jnm.snmjournals.org/highwire/filestream/97615/field_highwire_adjunct_files/0/240366_Supplemental_Data.pdf)
Supplement: 240366_Supplemental_Data.pdf [file 240366_Supplemental_Data.pdf]

| Target               | Energy (MeV) | EGS++ 2018          | FLUKA 2011          | GATE 8.1            | Geant4 10.5         | MCNPX 2.7           | PENELOPE 2014       | OpenDose mean       |
|----------------------|--------------|---------------------|---------------------|---------------------|---------------------|---------------------|---------------------|---------------------|
| Blood Vessels, Trunk | 0.05         | 2.022e-01 ± 7.6e-05 | 2.054e-01 ± 3.7e-05 | 2.032e-01 ± 7.6e-05 | 2.038e-01 ± 2.2e-04 | 2.052e-01 ± 8.2e-05 | 2.028e-01 ± 7.6e-05 | 2.042e-01 ± 1.2e-03 |
|                      | 0.1          | 1.108e-01 ± 3.8e-05 | 1.125e-01 ± 1.9e-05 | 1.120e-01 ± 3.8e-05 | 1.122e-01 ± 1.0e-04 | 1.127e-01 ± 3.4e-05 | 1.122e-01 ± 3.7e-05 | 1.122e-01 ± 5.8e-04 |
|                      | 0.2          | 1.160e-01 ± 3.8e-05 | 1.169e-01 ± 5.7e-05 | 1.171e-01 ± 3.8e-05 | 1.162e-01 ± 1.0e-04 | 1.171e-01 ± 3.5e-05 | 1.170e-01 ± 3.7e-05 | 1.169e-01 ± 4.3e-04 |
|                      | 0.5          | 1.205e-01 ± 4.7e-05 | 1.207e-01 ± 7.4e-06 | 1.206e-01 ± 4.7e-05 | 1.211e-01 ± 5.5e-05 | 1.206e-01 ± 4.8e-05 | 1.208e-01 ± 4.4e-05 | 1.207e-01 ± 1.9e-04 |
|                      | 1            | 1.052e-01 ± 4.7e-05 | 1.051e-01 ± 7.5e-06 | 1.049e-01 ± 4.7e-05 | 1.058e-01 ± 2.4e-05 | 1.047e-01 ± 4.2e-05 | 1.053e-01 ± 3.9e-05 | 1.051e-01 ± 3.2e-04 |
|                      | 2            | 7.574e-02 ± 4.1e-05 | 7.561e-02 ± 2.2e-05 | 7.540e-02 ± 4.1e-05 | 7.567e-02 ± 1.4e-05 | 7.490e-02 ± 3.7e-05 | 7.575e-02 ± 2.6e-05 | 7.551e-02 ± 2.7e-04 |
|                      | 5            | 3.808e-02 ± 2.7e-05 | 3.817e-02 ± 6.1e-05 | 3.809e-02 ± 2.7e-05 | 3.804e-02 ± 1.1e-05 | 3.726e-02 ± 2.6e-05 | 3.809e-02 ± 1.2e-05 | 3.800e-02 ± 2.8e-04 |
| Brain                | 0.05         | 2.840e-04 ± 1.3e-06 | 2.714e-04 ± 4.3e-07 | 2.766e-04 ± 1.3e-06 | 2.824e-04 ± 3.6e-06 | 2.688e-04 ± 1.3e-06 | 2.694e-04 ± 1.2e-06 | 2.743e-04 ± 5.7e-06 |
|                      | 0.1          | 5.426e-04 ± 1.4e-06 | 5.385e-04 ± 1.1e-06 | 5.392e-04 ± 1.4e-06 | 5.525e-04 ± 3.4e-06 | 5.382e-04 ± 1.4e-06 | 5.359e-04 ± 1.1e-06 | 5.409e-04 ± 4.8e-06 |
|                      | 0.2          | 6.458e-04 ± 1.3e-06 | 6.484e-04 ± 2.6e-06 | 6.499e-04 ± 1.3e-06 | 6.549e-04 ± 3.0e-06 | 6.488e-04 ± 1.4e-06 | 6.477e-04 ± 1.0e-06 | 6.497e-04 ± 2.6e-06 |
|                      | 0.5          | 8.121e-04 ± 1.6e-06 | 8.172e-04 ± 5.6e-07 | 8.171e-04 ± 1.7e-06 | 8.124e-04 ± 2.4e-06 | 8.126e-04 ± 1.6e-06 | 8.133e-04 ± 1.3e-06 | 8.144e-04 ± 2.4e-06 |
|                      | 1            | 9.206e-04 ± 1.9e-06 | 9.238e-04 ± 8.1e-07 | 9.222e-04 ± 1.9e-06 | 9.242e-04 ± 1.7e-06 | 9.226e-04 ± 1.9e-06 | 9.227e-04 ± 1.5e-06 | 9.221e-04 ± 1.6e-06 |
|                      | 2            | 9.645e-04 ± 2.1e-06 | 9.660e-04 ± 2.0e-05 | 9.618e-04 ± 2.1e-06 | 9.623e-04 ± 1.3e-06 | 9.674e-04 ± 2.1e-06 | 9.642e-04 ± 1.2e-06 | 9.645e-04 ± 2.0e-06 |
|                      | 5            | 8.956e-04 ± 2.1e-06 | 8.973e-04 ± 2.3e-06 | 8.933e-04 ± 2.1e-06 | 8.920e-04 ± 1.0e-06 | 8.971e-04 ± 2.2e-06 | 8.962e-04 ± 8.2e-07 | 8.951e-04 ± 1.9e-06 |
| Liver                | 0.05         | 1.979e-02 ± 1.0e-05 | 2.011e-02 ± 3.6e-06 | 2.005e-02 ± 1.0e-05 | 2.031e-02 ± 2.9e-05 | 2.010e-02 ± 1.0e-05 | 2.004e-02 ± 9.7e-06 | 2.007e-02 ± 1.3e-04 |
|                      | 0.1          | 1.459e-02 ± 7.0e-06 | 1.487e-02 ± 1.0e-05 | 1.479e-02 ± 7.0e-06 | 1.493e-02 ± 1.6e-05 | 1.487e-02 ± 7.4e-06 | 1.483e-02 ± 5.7e-06 | 1.482e-02 ± 9.8e-05 |
|                      | 0.2          | 1.314e-02 ± 5.9e-06 | 1.325e-02 ± 9.3e-07 | 1.323e-02 ± 6.0e-06 | 1.330e-02 ± 1.3e-05 | 1.328e-02 ± 6.6e-06 | 1.325e-02 ± 4.7e-06 | 1.325e-02 ± 4.7e-05 |
|                      | 0.5          | 1.254e-02 ± 6.5e-06 | 1.258e-02 ± 3.3e-07 | 1.256e-02 ± 6.5e-06 | 1.259e-02 ± 8.0e-06 | 1.260e-02 ± 6.3e-06 | 1.258e-02 ± 5.4e-06 | 1.257e-02 ± 2.0e-05 |
|                      | 1            | 1.161e-02 ± 6.8e-06 | 1.163e-02 ± 3.5e-06 | 1.162e-02 ± 6.8e-06 | 1.169e-02 ± 4.4e-06 | 1.165e-02 ± 7.0e-06 | 1.163e-02 ± 5.1e-06 | 1.163e-02 ± 2.3e-05 |
|                      | 2            | 1.008e-02 ± 6.7e-06 | 1.009e-02 ± 2.9e-04 | 1.009e-02 ± 6.7e-06 | 1.012e-02 ± 2.6e-06 | 1.012e-02 ± 7.1e-06 | 1.011e-02 ± 3.8e-06 | 1.010e-02 ± 1.5e-05 |
|                      | 5            | 7.826e-03 ± 6.1e-06 | 7.829e-03 ± 5.6e-06 | 7.825e-03 ± 6.1e-06 | 7.793e-03 ± 1.6e-06 | 7.851e-03 ± 6.3e-06 | 7.832e-03 ± 2.2e-06 | 7.828e-03 ± 1.8e-05 |

**Supplemental Table 1.** OpenDose photon SAFs ( $kg^{-1}$ ) for the model ICRP 110 adult female, the source Blood Vessels Trunk and target Blood Vessels Trunk, Brain and Liver. SAFs are given for a selection of different Monte Carlo codes and the mean over all available OpenDose data is also shown.

| Target               | Energy (MeV) | EGS++ 2018          | FLUKA 2011          | GATE 8.1            | Geant4 10.5         | MCNPX 2.7           | PENELOPE 2014       | OpenDose mean       |
|----------------------|--------------|---------------------|---------------------|---------------------|---------------------|---------------------|---------------------|---------------------|
| Spleen               | 0.05         | 1.776e-02 ± 3.1e-05 | 1.813e-02 ± 5.0e-05 | 1.808e-02 ± 3.2e-05 | 1.844e-02 ± 9.3e-05 | 1.810e-02 ± 3.1e-05 | 1.810e-02 ± 3.0e-05 | 1.810e-02 ± 1.7e-04 |
|                      | 0.1          | 1.309e-02 ± 1.9e-05 | 1.337e-02 ± 1.4e-05 | 1.327e-02 ± 2.0e-05 | 1.353e-02 ± 5.3e-05 | 1.333e-02 ± 2.0e-05 | 1.329e-02 ± 1.8e-05 | 1.331e-02 ± 1.1e-04 |
|                      | 0.2          | 1.156e-02 ± 1.6e-05 | 1.169e-02 ± 1.6e-05 | 1.166e-02 ± 1.6e-05 | 1.169e-02 ± 4.2e-05 | 1.168e-02 ± 1.6e-05 | 1.169e-02 ± 1.4e-05 | 1.167e-02 ± 4.0e-05 |
|                      | 0.5          | 1.087e-02 ± 1.8e-05 | 1.090e-02 ± 1.1e-05 | 1.092e-02 ± 1.8e-05 | 1.094e-02 ± 2.7e-05 | 1.092e-02 ± 1.9e-05 | 1.090e-02 ± 1.6e-05 | 1.090e-02 ± 2.6e-05 |
|                      | 1            | 1.000e-02 ± 2.0e-05 | 1.005e-02 ± 3.8e-05 | 9.985e-03 ± 1.9e-05 | 1.006e-02 ± 1.7e-05 | 1.005e-02 ± 1.9e-05 | 1.005e-02 ± 1.6e-05 | 1.003e-02 ± 2.6e-05 |
|                      | 2            | 8.697e-03 ± 1.9e-05 | 8.736e-03 ± 1.8e-05 | 8.695e-03 ± 1.9e-05 | 8.744e-03 ± 1.2e-05 | 8.705e-03 ± 1.9e-05 | 8.726e-03 ± 1.2e-05 | 8.710e-03 ± 2.4e-05 |
|                      | 5            | 6.815e-03 ± 1.7e-05 | 6.797e-03 ± 2.1e-05 | 6.803e-03 ± 1.7e-05 | 6.803e-03 ± 8.7e-06 | 6.805e-03 ± 1.7e-05 | 6.795e-03 ± 6.7e-06 | 6.798e-03 ± 1.1e-05 |
| Thyroid              | 0.05         | 6.722e-02 ± 1.7e-04 | 6.869e-02 ± 3.2e-04 | 6.796e-02 ± 1.7e-04 | 7.334e-02 ± 5.1e-04 | 6.938e-02 ± 1.7e-04 | 6.765e-02 ± 1.6e-04 | 6.885e-02 ± 1.8e-03 |
|                      | 0.1          | 3.754e-02 ± 8.8e-05 | 3.778e-02 ± 1.3e-04 | 3.751e-02 ± 8.8e-05 | 3.850e-02 ± 2.5e-04 | 3.801e-02 ± 8.7e-05 | 3.765e-02 ± 8.3e-05 | 3.783e-02 ± 3.1e-04 |
|                      | 0.2          | 3.461e-02 ± 7.8e-05 | 3.460e-02 ± 8.7e-05 | 3.457e-02 ± 7.8e-05 | 3.442e-02 ± 2.1e-04 | 3.464e-02 ± 8.0e-05 | 3.454e-02 ± 7.4e-05 | 3.457e-02 ± 7.1e-05 |
|                      | 0.5          | 3.442e-02 ± 9.3e-05 | 3.428e-02 ± 1.7e-04 | 3.435e-02 ± 9.3e-05 | 3.429e-02 ± 1.3e-04 | 3.430e-02 ± 9.3e-05 | 3.432e-02 ± 8.6e-05 | 3.430e-02 ± 6.5e-05 |
|                      | 1            | 3.172e-02 ± 9.8e-05 | 3.160e-02 ± 1.4e-04 | 3.182e-02 ± 9.8e-05 | 3.238e-02 ± 8.5e-05 | 3.180e-02 ± 9.9e-05 | 3.151e-02 ± 8.0e-05 | 3.177e-02 ± 2.5e-04 |
|                      | 2            | 2.689e-02 ± 9.2e-05 | 2.715e-02 ± 4.1e-05 | 2.712e-02 ± 9.2e-05 | 2.804e-02 ± 6.2e-05 | 2.708e-02 ± 9.2e-05 | 2.698e-02 ± 5.8e-05 | 2.714e-02 ± 3.5e-04 |
|                      | 5            | 1.958e-02 ± 7.2e-05 | 1.964e-02 ± 1.2e-04 | 1.964e-02 ± 7.2e-05 | 1.939e-02 ± 4.2e-05 | 1.947e-02 ± 7.0e-05 | 1.960e-02 ± 3.2e-05 | 1.956e-02 ± 8.2e-05 |
| Urinary Bladder Wall | 0.05         | 2.722e-02 ± 6.9e-05 | 2.772e-02 ± 6.4e-05 | 2.764e-02 ± 6.9e-05 | 2.759e-02 ± 2.1e-04 | 2.773e-02 ± 6.9e-05 | 2.752e-02 ± 6.8e-05 | 2.760e-02 ± 1.6e-04 |
|                      | 0.1          | 1.699e-02 ± 3.7e-05 | 1.734e-02 ± 1.6e-05 | 1.730e-02 ± 3.8e-05 | 1.738e-02 ± 1.1e-04 | 1.740e-02 ± 3.8e-05 | 1.728e-02 ± 3.6e-05 | 1.729e-02 ± 1.2e-04 |
|                      | 0.2          | 1.585e-02 ± 3.3e-05 | 1.602e-02 ± 2.1e-05 | 1.595e-02 ± 3.3e-05 | 1.598e-02 ± 9.2e-05 | 1.611e-02 ± 3.2e-05 | 1.598e-02 ± 3.2e-05 | 1.600e-02 ± 8.2e-05 |
|                      | 0.5          | 1.569e-02 ± 3.9e-05 | 1.568e-02 ± 7.2e-05 | 1.572e-02 ± 3.9e-05 | 1.566e-02 ± 5.9e-05 | 1.569e-02 ± 3.9e-05 | 1.576e-02 ± 3.7e-05 | 1.569e-02 ± 2.9e-05 |
|                      | 1            | 1.448e-02 ± 4.0e-05 | 1.453e-02 ± 1.0e-04 | 1.447e-02 ± 4.0e-05 | 1.459e-02 ± 3.8e-05 | 1.452e-02 ± 3.9e-05 | 1.446e-02 ± 3.5e-05 | 1.450e-02 ± 4.0e-05 |
|                      | 2            | 1.229e-02 ± 3.4e-05 | 1.233e-02 ± 6.5e-05 | 1.229e-02 ± 3.4e-05 | 1.231e-02 ± 2.7e-05 | 1.235e-02 ± 3.3e-05 | 1.240e-02 ± 2.5e-05 | 1.234e-02 ± 3.8e-05 |
|                      | 5            | 8.891e-03 ± 2.4e-05 | 8.833e-03 ± 3.5e-07 | 8.858e-03 ± 2.4e-05 | 8.963e-03 ± 1.9e-05 | 8.878e-03 ± 2.3e-05 | 8.931e-03 ± 1.4e-05 | 8.897e-03 ± 3.9e-05 |

**Supplemental Table 2.** *OpenDose photon SAFs ( $kg^{-1}$ ) for the model ICRP 110 adult female, the source Blood Vessels Trunk and target Spleen, Thyroid and Urinary Bladder Wall. SAFs are given for a selection of different Monte Carlo codes and the mean over all available OpenDose data is also shown.*

| Target               | Energy (MeV) | EGS++ 2018          | FLUKA 2011          | GATE 8.1            | Geant4 10.5         | MCNPX 2.7           | PENELOPE 2014       | OpenDose mean       |
|----------------------|--------------|---------------------|---------------------|---------------------|---------------------|---------------------|---------------------|---------------------|
| Blood Vessels, Trunk | 0.05         | 4.111e+00 ± 2.1e-05 | 4.086e+00 ± 3.2e-05 | 4.111e+00 ± 2.2e-05 | 4.111e+00 ± 3.2e-04 | 4.110e+00 ± 0.0e+00 | 4.111e+00 ± 4.1e-04 | 4.108e+00 ± 8.2e-03 |
|                      | 0.1          | 4.078e+00 ± 3.8e-05 | 4.065e+00 ± 2.7e-05 | 4.076e+00 ± 3.9e-05 | 4.077e+00 ± 8.1e-04 | 4.074e+00 ± 0.0e+00 | 4.078e+00 ± 4.1e-04 | 4.075e+00 ± 4.0e-03 |
|                      | 0.2          | 3.980e+00 ± 6.4e-05 | 3.974e+00 ± 8.3e-05 | 3.978e+00 ± 6.5e-05 | 3.979e+00 ± 1.1e-03 | 3.972e+00 ± 0.0e+00 | 3.982e+00 ± 3.9e-04 | 3.978e+00 ± 3.3e-03 |
|                      | 0.5          | 3.614e+00 ± 1.1e-04 | 3.608e+00 ± 2.0e-04 | 3.609e+00 ± 1.1e-04 | 3.612e+00 ± 1.1e-03 | 3.591e+00 ± 0.0e+00 | 3.617e+00 ± 3.3e-04 | 3.609e+00 ± 7.6e-03 |
|                      | 1            | 3.052e+00 ± 1.4e-04 | 3.046e+00 ± 3.7e-04 | 3.044e+00 ± 1.4e-04 | 3.051e+00 ± 9.4e-04 | 3.010e+00 ± 0.0e+00 | 3.054e+00 ± 2.4e-04 | 3.044e+00 ± 1.3e-02 |
|                      | 2            | 2.262e+00 ± 1.5e-04 | 2.264e+00 ± 8.9e-05 | 2.259e+00 ± 1.5e-04 | 2.265e+00 ± 7.0e-04 | 2.210e+00 ± 2.2e-04 | 2.264e+00 ± 1.4e-04 | 2.256e+00 ± 1.8e-02 |
|                      | 5            | 1.224e+00 ± 1.1e-04 | 1.234e+00 ± 5.3e-05 | 1.231e+00 ± 1.1e-04 | 1.233e+00 ± 3.7e-04 | 1.182e+00 ± 1.2e-04 | 1.224e+00 ± 6.5e-05 | 1.224e+00 ± 1.6e-02 |
| Brain                | 0.05         | 1.232e-09 ± 1.0e-09 | 6.428e-09 ± 6.4e-09 | 1.252e-09 ± 1.3e-09 | 4.599e-08 ± 4.2e-08 | 0.000e+00 ± 0.0e+00 | 4.021e-09 ± 4.1e-09 | 7.550e-09 ± 1.5e-08 |
|                      | 0.1          | 6.045e-08 ± 1.4e-08 | 5.600e-08 ± 5.3e-09 | 2.969e-08 ± 7.8e-09 | 1.765e-09 ± 1.8e-09 | 5.276e-08 ± 1.2e-08 | 5.978e-08 ± 1.1e-08 | 4.098e-08 ± 1.9e-08 |
|                      | 0.2          | 1.966e-07 ± 1.8e-08 | 2.161e-07 ± 2.4e-08 | 1.923e-07 ± 2.0e-08 | 2.775e-07 ± 6.0e-08 | 2.331e-07 ± 2.1e-08 | 1.983e-07 ± 1.7e-08 | 2.099e-07 ± 3.1e-08 |
|                      | 0.5          | 7.215e-07 ± 2.7e-08 | 7.580e-07 ± 2.8e-08 | 7.207e-07 ± 2.9e-08 | 6.542e-07 ± 5.7e-08 | 7.687e-07 ± 2.8e-08 | 6.985e-07 ± 2.2e-08 | 7.191e-07 ± 3.5e-08 |
|                      | 1            | 1.840e-06 ± 4.2e-08 | 1.888e-06 ± 3.5e-08 | 1.757e-06 ± 4.0e-08 | 1.805e-06 ± 7.2e-08 | 1.857e-06 ± 4.1e-08 | 1.861e-06 ± 3.4e-08 | 1.838e-06 ± 3.8e-08 |
|                      | 2            | 4.666e-06 ± 6.7e-08 | 4.645e-06 ± 8.4e-08 | 4.610e-06 ± 6.8e-08 | 4.325e-06 ± 8.1e-08 | 4.891e-06 ± 7.0e-08 | 4.627e-06 ± 5.2e-08 | 4.629e-06 ± 1.5e-07 |
|                      | 5            | 1.567e-05 ± 1.3e-07 | 1.611e-05 ± 8.8e-08 | 1.558e-05 ± 1.3e-07 | 1.550e-05 ± 1.0e-07 | 1.624e-05 ± 1.4e-07 | 1.555e-05 ± 8.1e-08 | 1.568e-05 ± 2.9e-07 |
| Liver                | 0.05         | 1.697e-05 ± 2.9e-07 | 3.599e-05 ± 9.3e-08 | 1.740e-05 ± 3.0e-07 | 1.791e-05 ± 5.3e-07 | 1.853e-05 ± 3.1e-07 | 1.673e-05 ± 2.9e-07 | 1.938e-05 ± 6.3e-06 |
|                      | 0.1          | 5.388e-05 ± 5.2e-07 | 6.324e-05 ± 5.0e-07 | 5.620e-05 ± 5.3e-07 | 5.508e-05 ± 8.9e-07 | 5.882e-05 ± 5.4e-07 | 5.413e-05 ± 5.1e-07 | 5.636e-05 ± 3.0e-06 |
|                      | 0.2          | 1.605e-04 ± 8.9e-07 | 1.658e-04 ± 1.1e-06 | 1.621e-04 ± 8.9e-07 | 1.623e-04 ± 1.3e-06 | 1.708e-04 ± 9.1e-07 | 1.597e-04 ± 8.8e-07 | 1.630e-04 ± 3.4e-06 |
|                      | 0.5          | 5.634e-04 ± 1.6e-06 | 5.679e-04 ± 3.1e-07 | 5.739e-04 ± 1.7e-06 | 5.619e-04 ± 1.7e-06 | 5.956e-04 ± 1.7e-06 | 5.625e-04 ± 1.6e-06 | 5.715e-04 ± 1.0e-05 |
|                      | 1            | 1.290e-03 ± 2.4e-06 | 1.300e-03 ± 2.3e-06 | 1.303e-03 ± 2.4e-06 | 1.284e-03 ± 1.9e-06 | 1.351e-03 ± 2.4e-06 | 1.290e-03 ± 2.0e-06 | 1.302e-03 ± 2.0e-05 |
|                      | 2            | 3.080e-03 ± 3.7e-06 | 3.082e-03 ± 2.9e-06 | 3.111e-03 ± 3.7e-06 | 3.089e-03 ± 2.1e-06 | 3.250e-03 ± 3.9e-06 | 3.084e-03 ± 2.2e-06 | 3.111e-03 ± 5.4e-05 |
|                      | 5            | 1.007e-02 ± 6.5e-06 | 1.001e-02 ± 4.4e-06 | 1.006e-02 ± 6.5e-06 | 1.009e-02 ± 8.1e-07 | 1.051e-02 ± 6.3e-06 | 1.009e-02 ± 2.5e-06 | 1.011e-02 ± 1.5e-04 |

**Supplemental Table 3.** OpenDose electron SAFs ( $kg^{-1}$ ) for the model ICRP 110 adult female, the source Blood Vessels Trunk and target Blood Vessels Trunk, Brain and Liver. SAFs are given for a selection of different Monte Carlo codes and the mean over all available OpenDose data is also shown.

| Target               | Energy (MeV) | EGS++ 2018          | FLUKA 2011          | GATE 8.1            | Geant4 10.5         | MCNPX 2.7           | PENELOPE 2014       | OpenDose mean       |
|----------------------|--------------|---------------------|---------------------|---------------------|---------------------|---------------------|---------------------|---------------------|
| Spleen               | 0.05         | 1.575e-06 ± 2.5e-07 | 1.241e-06 ± 6.7e-08 | 1.642e-06 ± 2.6e-07 | 1.091e-06 ± 7.3e-07 | 1.185e-06 ± 2.2e-07 | 1.524e-06 ± 2.5e-07 | 1.351e-06 ± 2.4e-07 |
|                      | 0.1          | 3.999e-06 ± 3.1e-07 | 4.454e-06 ± 5.2e-09 | 4.431e-06 ± 3.2e-07 | 3.263e-06 ± 7.9e-07 | 4.842e-06 ± 3.4e-07 | 3.925e-06 ± 3.0e-07 | 4.216e-06 ± 4.7e-07 |
|                      | 0.2          | 1.051e-05 ± 3.8e-07 | 1.101e-05 ± 1.4e-08 | 1.047e-05 ± 3.7e-07 | 1.001e-05 ± 1.1e-06 | 1.053e-05 ± 3.8e-07 | 9.672e-06 ± 3.4e-07 | 1.025e-05 ± 4.1e-07 |
|                      | 0.5          | 2.230e-05 ± 4.0e-07 | 2.418e-05 ± 5.1e-07 | 2.242e-05 ± 3.9e-07 | 2.396e-05 ± 1.1e-06 | 2.437e-05 ± 4.2e-07 | 2.232e-05 ± 3.7e-07 | 2.316e-05 ± 8.2e-07 |
|                      | 1            | 4.044e-05 ± 4.8e-07 | 4.329e-05 ± 3.8e-07 | 4.132e-05 ± 4.8e-07 | 4.120e-05 ± 1.0e-06 | 4.426e-05 ± 5.0e-07 | 4.094e-05 ± 4.5e-07 | 4.194e-05 ± 1.2e-06 |
|                      | 2            | 8.394e-05 ± 7.8e-07 | 8.988e-05 ± 5.0e-07 | 8.826e-05 ± 8.2e-07 | 8.373e-05 ± 1.1e-06 | 9.213e-05 ± 8.5e-07 | 8.634e-05 ± 6.7e-07 | 8.713e-05 ± 2.7e-06 |
|                      | 5            | 1.588e-03 ± 5.9e-06 | 1.582e-03 ± 6.2e-06 | 1.600e-03 ± 5.9e-06 | 1.606e-03 ± 3.7e-06 | 1.765e-03 ± 6.2e-06 | 1.622e-03 ± 3.3e-06 | 1.614e-03 ± 5.8e-05 |
| Thyroid              | 0.05         | 3.158e-05 ± 3.3e-06 | 1.231e-04 ± 8.7e-06 | 3.320e-05 ± 3.5e-06 | 2.031e-05 ± 6.2e-06 | 3.344e-05 ± 3.5e-06 | 4.121e-05 ± 3.8e-06 | 4.273e-05 ± 3.1e-05 |
|                      | 0.1          | 9.938e-05 ± 5.8e-06 | 1.666e-04 ± 2.4e-06 | 9.510e-05 ± 5.7e-06 | 1.106e-04 ± 1.1e-05 | 1.054e-04 ± 5.9e-06 | 9.314e-05 ± 5.5e-06 | 1.067e-04 ± 2.4e-05 |
|                      | 0.2          | 2.729e-04 ± 9.7e-06 | 3.263e-04 ± 4.9e-06 | 2.637e-04 ± 9.5e-06 | 2.587e-04 ± 1.5e-05 | 2.813e-04 ± 9.7e-06 | 2.707e-04 ± 9.5e-06 | 2.738e-04 ± 2.1e-05 |
|                      | 0.5          | 1.238e-03 ± 2.1e-05 | 1.280e-03 ± 9.1e-06 | 1.241e-03 ± 2.1e-05 | 1.251e-03 ± 2.2e-05 | 1.330e-03 ± 2.1e-05 | 1.201e-03 ± 1.9e-05 | 1.253e-03 ± 3.7e-05 |
|                      | 1            | 6.444e-03 ± 4.4e-05 | 6.612e-03 ± 3.0e-05 | 6.586e-03 ± 4.4e-05 | 6.574e-03 ± 3.8e-05 | 6.997e-03 ± 4.5e-05 | 6.368e-03 ± 3.8e-05 | 6.568e-03 ± 1.9e-04 |
|                      | 2            | 3.960e-02 ± 1.1e-04 | 3.961e-02 ± 1.4e-05 | 4.028e-02 ± 1.1e-04 | 3.966e-02 ± 7.2e-05 | 4.308e-02 ± 1.1e-04 | 3.970e-02 ± 7.2e-05 | 4.021e-02 ± 1.1e-03 |
|                      | 5            | 1.411e-01 ± 2.0e-04 | 1.409e-01 ± 2.9e-04 | 1.409e-01 ± 2.0e-04 | 1.405e-01 ± 1.0e-04 | 1.454e-01 ± 2.0e-04 | 1.412e-01 ± 8.4e-05 | 1.414e-01 ± 1.6e-03 |
| Urinary Bladder Wall | 0.05         | 3.482e-04 ± 8.0e-06 | 8.495e-04 ± 2.2e-05 | 3.639e-04 ± 8.2e-06 | 3.898e-04 ± 1.4e-05 | 3.752e-04 ± 8.3e-06 | 3.551e-04 ± 8.1e-06 | 4.161e-04 ± 1.6e-04 |
|                      | 0.1          | 1.140e-03 ± 1.4e-05 | 1.254e-03 ± 1.0e-05 | 1.194e-03 ± 1.5e-05 | 1.121e-03 ± 2.3e-05 | 1.214e-03 ± 1.5e-05 | 1.111e-03 ± 1.4e-05 | 1.169e-03 ± 4.9e-05 |
|                      | 0.2          | 3.415e-03 ± 2.5e-05 | 3.305e-03 ± 3.3e-06 | 3.475e-03 ± 2.5e-05 | 3.518e-03 ± 3.6e-05 | 3.660e-03 ± 2.6e-05 | 3.430e-03 ± 2.5e-05 | 3.469e-03 ± 9.4e-05 |
|                      | 0.5          | 1.226e-02 ± 4.6e-05 | 1.213e-02 ± 4.7e-05 | 1.244e-02 ± 4.6e-05 | 1.256e-02 ± 4.7e-05 | 1.289e-02 ± 4.6e-05 | 1.221e-02 ± 4.4e-05 | 1.241e-02 ± 2.3e-04 |
|                      | 1            | 2.594e-02 ± 6.2e-05 | 2.584e-02 ± 1.7e-04 | 2.627e-02 ± 6.3e-05 | 2.607e-02 ± 5.0e-05 | 2.702e-02 ± 6.2e-05 | 2.602e-02 ± 5.3e-05 | 2.617e-02 ± 3.5e-04 |
|                      | 2            | 4.425e-02 ± 7.0e-05 | 4.396e-02 ± 1.3e-04 | 4.431e-02 ± 7.0e-05 | 4.403e-02 ± 5.2e-05 | 4.535e-02 ± 6.8e-05 | 4.425e-02 ± 5.0e-05 | 4.435e-02 ± 4.0e-04 |
|                      | 5            | 5.103e-02 ± 5.7e-05 | 5.088e-02 ± 1.1e-04 | 5.107e-02 ± 5.7e-05 | 5.064e-02 ± 4.5e-05 | 5.101e-02 ± 5.6e-05 | 5.123e-02 ± 3.3e-05 | 5.101e-02 ± 1.7e-04 |

**Supplemental Table 4.** OpenDose electron SAFs ( $kg^{-1}$ ) for the model ICRP 110 adult female, the source Blood Vessels Trunk and target Spleen, Thyroid and Urinary Bladder Wall. SAFs are given for a selection of different Monte Carlo codes and the mean over all available OpenDose data is also shown.

| Target               | Energy (MeV) | EGS++ 2018          | FLUKA 2011          | GATE 8.1            | Geant4 10.5         | MCNPX 2.7           | PENELOP E 2014      | OpenDose mean       | ICRP 133  | diff.  |
|----------------------|--------------|---------------------|---------------------|---------------------|---------------------|---------------------|---------------------|---------------------|-----------|--------|
| Blood Vessels, Trunk | 0.05         | 2.031e-02 ± 2.4e-05 | 2.062e-02 ± 2.9e-05 | 2.047e-02 ± 2.4e-05 | 2.068e-02 ± 7.2e-05 | 2.056e-02 ± 2.5e-05 | 2.047e-02 ± 2.4e-05 | 2.053e-02 ± 1.1e-04 | -         | -      |
|                      | 0.1          | 1.472e-02 ± 1.5e-05 | 1.496e-02 ± 8.7e-06 | 1.490e-02 ± 1.5e-05 | 1.503e-02 ± 4.1e-05 | 1.496e-02 ± 1.5e-05 | 1.492e-02 ± 1.4e-05 | 1.492e-02 ± 8.7e-05 | -         | -      |
|                      | 0.2          | 1.320e-02 ± 1.2e-05 | 1.330e-02 ± 2.0e-05 | 1.326e-02 ± 1.2e-05 | 1.328e-02 ± 3.3e-05 | 1.331e-02 ± 1.2e-05 | 1.330e-02 ± 1.1e-05 | 1.328e-02 ± 3.4e-05 | -         | -      |
|                      | 0.5          | 1.259e-02 ± 1.4e-05 | 1.257e-02 ± 1.2e-05 | 1.255e-02 ± 1.4e-05 | 1.264e-02 ± 2.1e-05 | 1.260e-02 ± 1.4e-05 | 1.259e-02 ± 1.3e-05 | 1.259e-02 ± 2.3e-05 | -         | -      |
|                      | 1            | 1.163e-02 ± 1.5e-05 | 1.165e-02 ± 3.3e-05 | 1.154e-02 ± 1.5e-05 | 1.166e-02 ± 1.3e-05 | 1.163e-02 ± 1.5e-05 | 1.162e-02 ± 1.2e-05 | 1.163e-02 ± 3.5e-05 | -         | -      |
|                      | 2            | 1.008e-02 ± 1.5e-05 | 1.007e-02 ± 2.6e-05 | 1.009e-02 ± 1.5e-05 | 1.012e-02 ± 9.4e-06 | 1.009e-02 ± 1.4e-05 | 1.011e-02 ± 9.2e-06 | 1.009e-02 ± 1.7e-05 | -         | -      |
|                      | 5            | 7.814e-03 ± 1.2e-05 | 7.810e-03 ± 2.0e-05 | 7.813e-03 ± 1.2e-05 | 7.807e-03 ± 6.6e-06 | 7.833e-03 ± 1.2e-05 | 7.826e-03 ± 5.3e-06 | 7.819e-03 ± 1.0e-05 | -         | -      |
| Brain                | 0.05         | 3.486e-05 ± 4.6e-07 | 3.026e-05 ± 2.1e-07 | 3.250e-05 ± 4.4e-07 | 3.288e-05 ± 1.2e-06 | 3.110e-05 ± 4.3e-07 | 3.080e-05 ± 4.0e-07 | 3.195e-05 ± 1.4e-06 | 3.091e-05 | -3.3%  |
|                      | 0.1          | 1.122e-04 ± 6.4e-07 | 1.073e-04 ± 1.6e-07 | 1.111e-04 ± 6.3e-07 | 1.113e-04 ± 1.5e-06 | 1.069e-04 ± 6.2e-07 | 1.087e-04 ± 5.1e-07 | 1.095e-04 ± 2.1e-06 | 1.085e-04 | -0.9%  |
|                      | 0.2          | 1.689e-04 ± 6.7e-07 | 1.664e-04 ± 4.2e-07 | 1.681e-04 ± 6.7e-07 | 1.712e-04 ± 1.5e-06 | 1.675e-04 ± 6.7e-07 | 1.678e-04 ± 5.1e-07 | 1.684e-04 ± 1.4e-06 | 1.704e-04 | 1.2%   |
|                      | 0.5          | 2.734e-04 ± 9.3e-07 | 2.740e-04 ± 9.1e-07 | 2.747e-04 ± 9.3e-07 | 2.705e-04 ± 1.4e-06 | 2.745e-04 ± 9.3e-07 | 2.736e-04 ± 7.6e-07 | 2.737e-04 ± 1.3e-06 | 2.716e-04 | -0.8%  |
|                      | 1            | 3.686e-04 ± 1.2e-06 | 3.705e-04 ± 4.2e-07 | 3.667e-04 ± 1.2e-06 | 3.740e-04 ± 1.1e-06 | 3.700e-04 ± 1.2e-06 | 3.691e-04 ± 9.1e-07 | 3.700e-04 ± 2.0e-06 | 3.731e-04 | 0.8%   |
|                      | 2            | 4.437e-04 ± 1.4e-06 | 4.445e-04 ± 1.8e-06 | 4.433e-04 ± 1.4e-06 | 4.429e-04 ± 8.8e-07 | 4.440e-04 ± 1.4e-06 | 4.425e-04 ± 8.4e-07 | 4.432e-04 ± 9.7e-07 | 4.421e-04 | -0.2%  |
|                      | 5            | 4.592e-04 ± 1.5e-06 | 4.586e-04 ± 1.7e-06 | 4.604e-04 ± 1.5e-06 | 4.537e-04 ± 7.2e-07 | 4.611e-04 ± 1.5e-06 | 4.617e-04 ± 5.9e-07 | 4.593e-04 ± 2.7e-06 | 4.552e-04 | -0.9%  |
| Liver                | 0.05         | 1.937e-01 ± 2.8e-05 | 1.983e-01 ± 1.9e-05 | 1.965e-01 ± 2.8e-05 | 1.985e-01 ± 6.9e-05 | 1.981e-01 ± 2.0e-05 | 1.964e-01 ± 3.1e-05 | 1.972e-01 ± 1.5e-03 | 1.590e-01 | -19.4% |
|                      | 0.1          | 1.105e-01 ± 1.7e-05 | 1.128e-01 ± 5.0e-06 | 1.122e-01 ± 1.7e-05 | 1.128e-01 ± 2.8e-05 | 1.129e-01 ± 2.3e-05 | 1.124e-01 ± 1.5e-05 | 1.124e-01 ± 7.4e-04 | 8.911e-02 | -20.7% |
|                      | 0.2          | 1.060e-01 ± 1.5e-05 | 1.070e-01 ± 1.0e-05 | 1.068e-01 ± 1.5e-05 | 1.064e-01 ± 2.4e-05 | 1.071e-01 ± 1.1e-05 | 1.069e-01 ± 1.4e-05 | 1.068e-01 ± 3.7e-04 | 8.315e-02 | -22.1% |
|                      | 0.5          | 1.060e-01 ± 1.8e-05 | 1.063e-01 ± 3.0e-05 | 1.062e-01 ± 1.8e-05 | 1.065e-01 ± 2.1e-05 | 1.063e-01 ± 2.1e-05 | 1.063e-01 ± 1.7e-05 | 1.063e-01 ± 1.3e-04 | 8.222e-02 | -22.6% |
|                      | 1            | 9.650e-02 ± 1.9e-05 | 9.652e-02 ± 2.6e-05 | 9.552e-02 ± 1.9e-05 | 9.715e-02 ± 2.6e-05 | 9.653e-02 ± 1.9e-05 | 9.659e-02 ± 1.5e-05 | 9.649e-02 ± 4.2e-04 | 7.317e-02 | -24.2% |
|                      | 2            | 7.886e-02 ± 1.8e-05 | 7.888e-02 ± 2.1e-05 | 7.878e-02 ± 1.8e-05 | 7.878e-02 ± 2.2e-05 | 7.867e-02 ± 1.6e-05 | 7.889e-02 ± 1.1e-05 | 7.880e-02 ± 7.0e-05 | 5.971e-02 | -24.2% |
|                      | 5            | 5.254e-02 ± 1.6e-05 | 5.264e-02 ± 1.2e-05 | 5.252e-02 ± 1.6e-05 | 5.238e-02 ± 1.5e-05 | 5.228e-02 ± 1.6e-05 | 5.257e-02 ± 5.7e-06 | 5.252e-02 ± 1.2e-04 | 4.089e-02 | -22.1% |

**Supplemental Table 5.** OpenDose photon SAFs ( $kg^{-1}$ ) for the model ICRP 110 adult female, the source Liver and target Blood Vessels Trunk, Brain and Liver. SAFs are given for a selection of different Monte Carlo codes and the last 2 columns compare the mean over all available OpenDose data to ICRP 133 data.

| Target               | Energy (MeV) | EGS++ 2018             | FLUKA 2011             | GATE 8.1               | Geant4 10.5            | MCNPX 2.7              | PENELOP E 2014         | OpenDose mean          | ICRP 133  | diff. |
|----------------------|--------------|------------------------|------------------------|------------------------|------------------------|------------------------|------------------------|------------------------|-----------|-------|
| Spleen               | 0.05         | 1.668e-02<br>± 3.0e-05 | 1.681e-02<br>± 2.7e-05 | 1.690e-02<br>± 3.0e-05 | 1.710e-02<br>± 8.9e-05 | 1.679e-02<br>± 3.0e-05 | 1.679e-02<br>± 2.9e-05 | 1.683e-02<br>± 1.2e-04 | 1.622e-02 | -3.6% |
|                      | 0.1          | 1.455e-02<br>± 2.1e-05 | 1.481e-02<br>± 3.8e-05 | 1.479e-02<br>± 2.1e-05 | 1.494e-02<br>± 5.6e-05 | 1.486e-02<br>± 2.1e-05 | 1.479e-02<br>± 1.9e-05 | 1.480e-02<br>± 1.1e-04 | 1.481e-02 | 0.0%  |
|                      | 0.2          | 1.297e-02<br>± 1.7e-05 | 1.312e-02<br>± 1.2e-05 | 1.307e-02<br>± 1.7e-05 | 1.317e-02<br>± 4.3e-05 | 1.309e-02<br>± 1.7e-05 | 1.309e-02<br>± 1.5e-05 | 1.308e-02<br>± 5.3e-05 | 1.321e-02 | 1.0%  |
|                      | 0.5          | 1.230e-02<br>± 1.9e-05 | 1.233e-02<br>± 1.4e-05 | 1.229e-02<br>± 1.9e-05 | 1.235e-02<br>± 2.9e-05 | 1.230e-02<br>± 1.8e-05 | 1.230e-02<br>± 1.7e-05 | 1.231e-02<br>± 2.3e-05 | 1.234e-02 | 0.3%  |
|                      | 1            | 1.145e-02<br>± 2.0e-05 | 1.147e-02<br>± 3.2e-05 | 1.133e-02<br>± 2.0e-05 | 1.146e-02<br>± 1.8e-05 | 1.148e-02<br>± 2.1e-05 | 1.145e-02<br>± 1.6e-05 | 1.145e-02<br>± 4.5e-05 | 1.133e-02 | -1.0% |
|                      | 2            | 1.009e-02<br>± 2.1e-05 | 1.007e-02<br>± 1.0e-06 | 1.008e-02<br>± 2.1e-05 | 1.006e-02<br>± 1.3e-05 | 1.008e-02<br>± 2.0e-05 | 1.011e-02<br>± 1.2e-05 | 1.008e-02<br>± 1.5e-05 | 9.897e-03 | -1.8% |
|                      | 5            | 7.960e-03<br>± 1.8e-05 | 7.967e-03<br>± 1.7e-05 | 7.962e-03<br>± 1.8e-05 | 7.932e-03<br>± 9.2e-06 | 7.954e-03<br>± 1.8e-05 | 7.945e-03<br>± 7.0e-06 | 7.954e-03<br>± 1.3e-05 | 7.953e-03 | -0.0% |
| Thyroid              | 0.05         | 1.833e-03<br>± 2.7e-05 | 1.752e-03<br>± 1.4e-05 | 1.790e-03<br>± 2.7e-05 | 1.922e-03<br>± 8.1e-05 | 1.804e-03<br>± 2.7e-05 | 1.817e-03<br>± 2.6e-05 | 1.813e-03<br>± 4.8e-05 | 1.753e-03 | -3.3% |
|                      | 0.1          | 2.309e-03<br>± 2.2e-05 | 2.335e-03<br>± 7.0e-06 | 2.326e-03<br>± 2.2e-05 | 2.524e-03<br>± 6.7e-05 | 2.363e-03<br>± 2.2e-05 | 2.355e-03<br>± 1.7e-05 | 2.360e-03<br>± 2.1e-05 | 2.306e-03 | -2.3% |
|                      | 0.2          | 2.321e-03<br>± 1.8e-05 | 2.326e-03<br>± 6.5e-06 | 2.284e-03<br>± 1.8e-05 | 2.354e-03<br>± 5.0e-05 | 2.276e-03<br>± 1.8e-05 | 2.271e-03<br>± 1.7e-05 | 2.303e-03<br>± 2.8e-05 | 2.353e-03 | 2.2%  |
|                      | 0.5          | 2.399e-03<br>± 2.1e-05 | 2.364e-03<br>± 1.1e-05 | 2.424e-03<br>± 2.1e-05 | 2.425e-03<br>± 3.6e-05 | 2.417e-03<br>± 2.1e-05 | 2.445e-03<br>± 2.0e-05 | 2.411e-03<br>± 2.3e-05 | 2.387e-03 | -1.0% |
|                      | 1            | 2.440e-03<br>± 2.4e-05 | 2.414e-03<br>± 2.7e-05 | 2.438e-03<br>± 2.4e-05 | 2.352e-03<br>± 2.4e-05 | 2.450e-03<br>± 2.5e-05 | 2.418e-03<br>± 2.0e-05 | 2.426e-03<br>± 3.3e-05 | 2.429e-03 | 0.1%  |
|                      | 2            | 2.273e-03<br>± 2.5e-05 | 2.326e-03<br>± 4.9e-05 | 2.305e-03<br>± 2.5e-05 | 2.248e-03<br>± 1.8e-05 | 2.331e-03<br>± 2.5e-05 | 2.346e-03<br>± 1.7e-05 | 2.300e-03<br>± 3.3e-05 | 2.350e-03 | 2.2%  |
|                      | 5            | 1.937e-03<br>± 2.2e-05 | 1.916e-03<br>± 4.2e-06 | 1.943e-03<br>± 2.2e-05 | 1.833e-03<br>± 1.3e-05 | 1.922e-03<br>± 2.2e-05 | 1.951e-03<br>± 1.0e-05 | 1.916e-03<br>± 3.5e-05 | 1.950e-03 | 1.8%  |
| Urinary Bladder Wall | 0.05         | 1.652e-04<br>± 5.2e-06 | 1.579e-04<br>± 2.1e-06 | 1.565e-04<br>± 5.1e-06 | 1.287e-04<br>± 1.3e-05 | 1.466e-04<br>± 4.9e-06 | 1.546e-04<br>± 5.0e-06 | 1.531e-04<br>± 1.1e-05 | 1.443e-04 | -5.7% |
|                      | 0.1          | 4.198e-04<br>± 6.0e-06 | 4.097e-04<br>± 1.2e-07 | 4.159e-04<br>± 5.9e-06 | 4.084e-04<br>± 1.7e-05 | 4.024e-04<br>± 5.8e-06 | 4.114e-04<br>± 5.8e-06 | 4.107e-04<br>± 6.2e-06 | 4.070e-04 | -0.9% |
|                      | 0.2          | 5.303e-04<br>± 5.3e-06 | 5.297e-04<br>± 2.7e-06 | 5.350e-04<br>± 5.3e-06 | 5.563e-04<br>± 1.6e-05 | 5.346e-04<br>± 5.3e-06 | 5.361e-04<br>± 5.1e-06 | 5.365e-04<br>± 7.8e-06 | 5.302e-04 | -1.2% |
|                      | 0.5          | 7.117e-04<br>± 6.9e-06 | 7.228e-04<br>± 2.8e-06 | 7.129e-04<br>± 6.9e-06 | 7.175e-04<br>± 1.2e-05 | 7.309e-04<br>± 7.0e-06 | 7.217e-04<br>± 6.8e-06 | 7.197e-04<br>± 7.1e-06 | 6.831e-04 | -5.1% |
|                      | 1            | 8.795e-04<br>± 8.7e-06 | 8.396e-04<br>± 2.2e-06 | 8.708e-04<br>± 8.5e-06 | 8.753e-04<br>± 9.4e-06 | 8.745e-04<br>± 8.6e-06 | 8.691e-04<br>± 7.7e-06 | 8.695e-04<br>± 1.2e-05 | 8.949e-04 | 2.9%  |
|                      | 2            | 9.621e-04<br>± 8.9e-06 | 9.734e-04<br>± 6.3e-06 | 9.637e-04<br>± 8.9e-06 | 9.637e-04<br>± 7.3e-06 | 9.568e-04<br>± 8.7e-06 | 9.531e-04<br>± 6.9e-06 | 9.596e-04<br>± 6.8e-06 | 9.755e-04 | 1.7%  |
|                      | 5            | 9.132e-04<br>± 7.2e-06 | 9.205e-04<br>± 3.8e-06 | 9.126e-04<br>± 7.3e-06 | 9.224e-04<br>± 5.9e-06 | 9.253e-04<br>± 7.2e-06 | 9.204e-04<br>± 4.7e-06 | 9.198e-04<br>± 4.2e-06 | 9.187e-04 | -0.1% |

**Supplemental Table 6.** OpenDose photon SAFs ( $kg^{-1}$ ) for the model ICRP 110 adult female, the source Liver and target Spleen, Thyroid and Urinary Bladder Wall. SAFs are given for a selection of different Monte Carlo codes and the last 2 columns compare the mean over all available OpenDose data to ICRP 133 data.

| Target               | Energy (MeV) | EGS++ 2018          | FLUKA 2011          | GATE 8.1            | Geant4 10.5         | MCNPX 2.7           | PENELOP E 2014      | OpenDose mean       | ICRP 133  | diff.  |
|----------------------|--------------|---------------------|---------------------|---------------------|---------------------|---------------------|---------------------|---------------------|-----------|--------|
| Blood Vessels, Trunk | 0.05         | 1.789e-05 ± 7.2e-07 | 3.802e-05 ± 1.1e-04 | 1.687e-05 ± 7.1e-07 | 1.796e-05 ± 1.3e-06 | 1.773e-05 ± 7.1e-07 | 1.873e-05 ± 7.5e-07 | 1.984e-05 ± 6.9e-06 | -         | -      |
|                      | 0.1          | 5.311e-05 ± 1.2e-06 | 6.910e-05 ± 5.9e-07 | 5.745e-05 ± 1.3e-06 | 5.644e-05 ± 2.2e-06 | 5.900e-05 ± 1.3e-06 | 2.947e-05 ± 1.0e-06 | 5.431e-05 ± 1.0e-05 | -         | -      |
|                      | 0.2          | 1.603e-04 ± 2.1e-06 | 1.701e-04 ± 5.1e-07 | 1.622e-04 ± 2.1e-06 | 1.619e-04 ± 3.2e-06 | 1.711e-04 ± 2.2e-06 | 1.563e-04 ± 2.1e-06 | 1.634e-04 ± 4.8e-06 | -         | -      |
|                      | 0.5          | 5.640e-04 ± 3.9e-06 | 5.769e-04 ± 8.9e-06 | 5.708e-04 ± 4.0e-06 | 5.729e-04 ± 4.0e-06 | 5.958e-04 ± 4.1e-06 | 5.560e-04 ± 3.7e-06 | 5.722e-04 ± 1.1e-05 | -         | -      |
|                      | 1            | 1.295e-03 ± 5.8e-06 | 1.300e-03 ± 5.8e-06 | 1.305e-03 ± 5.8e-06 | 1.263e-03 ± 4.5e-06 | 1.343e-03 ± 5.9e-06 | 1.289e-03 ± 4.8e-06 | 1.299e-03 ± 2.2e-05 | -         | -      |
|                      | 2            | 3.092e-03 ± 8.7e-06 | 3.112e-03 ± 1.2e-05 | 3.115e-03 ± 8.7e-06 | 3.095e-03 ± 5.5e-06 | 3.251e-03 ± 8.8e-06 | 3.090e-03 ± 5.3e-06 | 3.114e-03 ± 5.3e-05 | -         | -      |
|                      | 5            | 1.005e-02 ± 1.5e-05 | 1.012e-02 ± 7.4e-05 | 1.004e-02 ± 1.5e-05 | 1.008e-02 ± 7.3e-06 | 1.050e-02 ± 1.5e-05 | 1.011e-02 ± 6.0e-06 | 1.012e-02 ± 1.5e-04 | -         | -      |
| Brain                | 0.05         | 0.0 ± 0.0           | 0.0 ± 0.0           | 0.0 ± 0.0           | 0.0 ± 0.0           | 0.0 ± 0.0           | 0.0 ± 0.0           | 0.0 ± 0.0           | 0.0       | -      |
|                      | 0.1          | 8.427e-09 ± 6.5e-09 | 1.471e-08 ± 3.4e-09 | 2.067e-09 ± 1.1e-09 | 0.0e00 ± 0.0e00     | 5.755e-09 ± 3.9e-09 | 5.432e-09 ± 3.1e-09 | 6.563e-09 ± 4.3e-09 | 0.0       | -      |
|                      | 0.2          | 3.136e-08 ± 7.6e-09 | 3.091e-08 ± 3.8e-09 | 3.029e-08 ± 6.9e-09 | 3.164e-08 ± 1.4e-08 | 2.285e-08 ± 5.5e-09 | 4.771e-08 ± 8.0e-09 | 3.193e-08 ± 7.8e-09 | 6.655e-08 | 108.5% |
|                      | 0.5          | 1.634e-07 ± 1.3e-08 | 1.355e-07 ± 3.4e-08 | 1.705e-07 ± 1.4e-08 | 1.679e-07 ± 3.2e-08 | 1.757e-07 ± 1.4e-08 | 1.521e-07 ± 1.0e-08 | 1.635e-07 ± 1.3e-08 | 1.650e-07 | 0.9%   |
|                      | 1            | 4.694e-07 ± 2.2e-08 | 4.736e-07 ± 1.7e-08 | 5.037e-07 ± 2.2e-08 | 4.520e-07 ± 3.7e-08 | 4.940e-07 ± 2.2e-08 | 4.631e-07 ± 1.7e-08 | 4.777e-07 ± 1.8e-08 | 5.057e-07 | 5.8%   |
|                      | 2            | 1.509e-06 ± 4.2e-08 | 1.367e-06 ± 3.2e-08 | 1.507e-06 ± 4.1e-08 | 1.507e-06 ± 4.7e-08 | 1.491e-06 ± 4.0e-08 | 1.498e-06 ± 3.1e-08 | 1.478e-06 ± 4.4e-08 | 1.605e-06 | 8.6%   |
|                      | 5            | 6.099e-06 ± 8.8e-08 | 6.244e-06 ± 3.4e-07 | 6.113e-06 ± 8.7e-08 | 6.076e-06 ± 6.5e-08 | 6.257e-06 ± 8.7e-08 | 6.072e-06 ± 5.3e-08 | 6.149e-06 ± 9.6e-08 | 5.870e-06 | -4.5%  |
| Liver                | 0.05         | 7.139e-01 ± 1.4e-06 | 7.133e-01 ± 0.0e+00 | 7.139e-01 ± 1.4e-06 | 7.139e-01 ± 5.8e-05 | 7.139e-01 ± 0.0e+00 | 7.139e-01 ± 7.1e-05 | 7.138e-01 ± 2.0e-04 | 5.522e-01 | -22.6% |
|                      | 0.1          | 7.130e-01 ± 2.5e-06 | 7.127e-01 ± 3.7e-06 | 7.130e-01 ± 2.6e-06 | 7.130e-01 ± 1.4e-04 | 7.129e-01 ± 0.0e+00 | 7.136e-01 ± 7.1e-05 | 7.130e-01 ± 2.3e-04 | 5.514e-01 | -22.7% |
|                      | 0.2          | 7.105e-01 ± 4.3e-06 | 7.103e-01 ± 2.8e-06 | 7.105e-01 ± 4.3e-06 | 7.105e-01 ± 2.0e-04 | 7.103e-01 ± 0.0e+00 | 7.105e-01 ± 6.9e-05 | 7.105e-01 ± 8.9e-05 | 5.492e-01 | -22.7% |
|                      | 0.5          | 7.011e-01 ± 7.9e-06 | 7.009e-01 ± 5.5e-06 | 7.010e-01 ± 7.9e-06 | 7.011e-01 ± 2.1e-04 | 7.005e-01 ± 0.0e+00 | 7.012e-01 ± 6.0e-05 | 7.010e-01 ± 2.1e-04 | 5.423e-01 | -22.6% |
|                      | 1            | 6.859e-01 ± 1.1e-05 | 6.857e-01 ± 1.3e-05 | 6.857e-01 ± 1.1e-05 | 6.859e-01 ± 2.1e-04 | 6.847e-01 ± 0.0e+00 | 6.860e-01 ± 4.7e-05 | 6.857e-01 ± 3.9e-04 | 5.284e-01 | -22.9% |
|                      | 2            | 6.577e-01 ± 1.5e-05 | 6.577e-01 ± 5.6e-05 | 6.575e-01 ± 1.5e-05 | 6.578e-01 ± 2.0e-04 | 6.555e-01 ± 0.0e+00 | 6.578e-01 ± 3.2e-05 | 6.574e-01 ± 7.4e-04 | 5.055e-01 | -23.1% |
|                      | 5            | 5.804e-01 ± 2.1e-05 | 5.812e-01 ± 7.0e-05 | 5.807e-01 ± 2.1e-05 | 5.810e-01 ± 1.8e-04 | 5.758e-01 ± 0.0e+00 | 5.802e-01 ± 1.9e-05 | 5.801e-01 ± 1.7e-03 | 4.499e-01 | -22.4% |

**Supplemental Table 7.** OpenDose electron SAFs ( $\text{kg}^{-1}$ ) for the model ICRP 110 adult female, the source Liver and target Blood Vessels Trunk, Brain and Liver. SAFs are given for a selection of different Monte Carlo codes and the last 2 columns compare the mean over all available OpenDose data to ICRP 133 data.

| Target               | Energy (MeV) | EGS++ 2018             | FLUKA 2011             | GATE 8.1               | Geant4 10.5            | MCNPX 2.7              | PENELOP E 2014         | OpenDose mean          | ICRP 133  | diff.   |
|----------------------|--------------|------------------------|------------------------|------------------------|------------------------|------------------------|------------------------|------------------------|-----------|---------|
| Spleen               | 0.05         | 6.004e-07<br>± 1.6e-07 | 6.899e-07<br>± 1.4e-05 | 5.851e-07<br>± 1.7e-07 | 5.154e-07<br>± 4.8e-07 | 8.723e-07<br>± 2.0e-07 | 6.104e-07<br>± 1.6e-07 | 6.002e-07<br>± 1.4e-07 | 2.016e-07 | -66.4%  |
|                      | 0.1          | 2.739e-06<br>± 2.6e-07 | 3.119e-06<br>± 4.3e-07 | 3.051e-06<br>± 2.8e-07 | 2.829e-06<br>± 9.0e-07 | 3.498e-06<br>± 3.0e-07 | 1.544e-06<br>± 1.9e-07 | 2.955e-06<br>± 6.6e-07 | 2.540e-06 | -14.0%  |
|                      | 0.2          | 8.369e-06<br>± 3.4e-07 | 8.778e-06<br>± 2.3e-07 | 7.429e-06<br>± 3.1e-07 | 9.856e-06<br>± 1.1e-06 | 8.983e-06<br>± 3.5e-07 | 8.677e-06<br>± 3.3e-07 | 8.513e-06<br>± 7.4e-07 | 8.631e-06 | 1.4%    |
|                      | 0.5          | 2.109e-05<br>± 3.8e-07 | 2.297e-05<br>± 3.6e-07 | 2.138e-05<br>± 4.0e-07 | 1.861e-05<br>± 9.3e-07 | 2.247e-05<br>± 4.0e-07 | 2.139e-05<br>± 3.6e-07 | 2.166e-05<br>± 1.3e-06 | 2.170e-05 | 0.2%    |
|                      | 1            | 4.240e-05<br>± 5.1e-07 | 4.340e-05<br>± 7.1e-07 | 4.330e-05<br>± 5.2e-07 | 4.139e-05<br>± 1.0e-06 | 4.455e-05<br>± 5.1e-07 | 4.254e-05<br>± 4.6e-07 | 4.275e-05<br>± 9.1e-07 | 4.584e-05 | 7.2%    |
|                      | 2            | 8.592e-05<br>± 7.6e-07 | 9.082e-05<br>± 2.1e-06 | 8.824e-05<br>± 7.7e-07 | 8.710e-05<br>± 1.1e-06 | 9.105e-05<br>± 7.6e-07 | 8.538e-05<br>± 6.1e-07 | 8.769e-05<br>± 2.0e-06 | 9.108e-05 | 3.9%    |
|                      | 5            | 2.263e-04<br>± 1.4e-06 | 2.263e-04<br>± 3.9e-06 | 2.253e-04<br>± 1.3e-06 | 2.156e-04<br>± 1.2e-06 | 2.334e-04<br>± 1.3e-06 | 2.248e-04<br>± 8.6e-07 | 2.253e-04<br>± 4.5e-06 | 2.250e-04 | -0.1%   |
| Thyroid              | 0.05         | 0.000e+00<br>± 0.0e+00 | 1.478e-09<br>± 1.5e-07 | 0.000e+00<br>± 0.0e+00 | 0.000e+00<br>± 0.0e+00 | 0.000e+00<br>± 0.0e+00 | 0.000e+00<br>± 0.0e+00 | 1.847e-10<br>± 5.2e-10 | 0.000e+00 | -100.0% |
|                      | 0.1          | 9.424e-08<br>± 4.9e-08 | 2.078e-07<br>± 2.1e-07 | 4.172e-08<br>± 2.9e-08 | 0.000e+00<br>± 0.0e+00 | 3.439e-07<br>± 2.6e-07 | 8.770e-08<br>± 5.2e-08 | 1.314e-07<br>± 1.2e-07 | 2.896e-07 | 120.2%  |
|                      | 0.2          | 7.255e-07<br>± 2.8e-07 | 1.069e-06<br>± 4.9e-07 | 1.148e-06<br>± 3.6e-07 | 6.556e-07<br>± 6.0e-07 | 9.704e-07<br>± 3.1e-07 | 1.276e-06<br>± 4.2e-07 | 1.031e-06<br>± 3.1e-07 | 8.380e-07 | -18.7%  |
|                      | 0.5          | 2.783e-06<br>± 3.5e-07 | 3.704e-06<br>± 1.3e-07 | 3.657e-06<br>± 4.4e-07 | 5.123e-06<br>± 1.3e-06 | 3.587e-06<br>± 4.6e-07 | 2.453e-06<br>± 3.4e-07 | 3.290e-06<br>± 8.6e-07 | 1.874e-06 | -43.0%  |
|                      | 1            | 6.276e-06<br>± 4.7e-07 | 8.215e-06<br>± 1.4e-06 | 7.256e-06<br>± 5.0e-07 | 6.587e-06<br>± 1.3e-06 | 6.903e-06<br>± 5.6e-07 | 7.300e-06<br>± 5.1e-07 | 7.077e-06<br>± 5.9e-07 | 8.355e-06 | 18.1%   |
|                      | 2            | 1.713e-05<br>± 1.0e-06 | 1.672e-05<br>± 1.7e-06 | 1.470e-05<br>± 7.5e-07 | 1.347e-05<br>± 1.2e-06 | 1.500e-05<br>± 7.8e-07 | 1.628e-05<br>± 8.7e-07 | 1.534e-05<br>± 1.2e-06 | 1.637e-05 | 6.7%    |
|                      | 5            | 4.218e-05<br>± 1.4e-06 | 3.855e-05<br>± 4.0e-06 | 4.452e-05<br>± 1.6e-06 | 4.621e-05<br>± 1.5e-06 | 4.472e-05<br>± 1.5e-06 | 4.499e-05<br>± 1.1e-06 | 4.380e-05<br>± 2.3e-06 | 3.874e-05 | -11.6%  |
| Urinary Bladder Wall | 0.05         | 0.000e+00<br>± 0.0e+00 | 0.000e+00 | -       |
|                      | 0.1          | 2.969e-08<br>± 2.2e-08 | 9.194e-08<br>± 9.2e-08 | 4.910e-08<br>± 4.5e-08 | 0.000e+00<br>± 0.0e+00 | 4.153e-18<br>± 2.2e-18 | 0.000e+00<br>± 0.0e+00 | 2.430e-08<br>± 3.3e-08 | 0.000e+00 | -100.0% |
|                      | 0.2          | 6.160e-08<br>± 2.7e-08 | 2.447e-07<br>± 1.3e-07 | 1.069e-07<br>± 6.8e-08 | 0.000e+00<br>± 0.0e+00 | 1.843e-07<br>± 9.1e-08 | 1.271e-07<br>± 5.2e-08 | 1.414e-07<br>± 7.2e-08 | 1.086e-07 | -23.2%  |
|                      | 0.5          | 4.236e-07<br>± 1.2e-07 | 5.559e-07<br>± 8.0e-08 | 5.103e-07<br>± 8.9e-08 | 8.154e-07<br>± 2.8e-07 | 5.879e-07<br>± 1.1e-07 | 5.155e-07<br>± 9.6e-08 | 5.753e-07<br>± 1.2e-07 | 5.907e-07 | 2.7%    |
|                      | 1            | 1.410e-06<br>± 1.7e-07 | 1.199e-06<br>± 4.4e-08 | 1.676e-06<br>± 1.8e-07 | 8.475e-07<br>± 2.5e-07 | 1.514e-06<br>± 1.5e-07 | 1.464e-06<br>± 1.6e-07 | 1.407e-06<br>± 2.5e-07 | 1.618e-06 | 15.0%   |
|                      | 2            | 4.418e-06<br>± 3.4e-07 | 5.469e-06<br>± 1.7e-06 | 4.055e-06<br>± 3.0e-07 | 3.626e-06<br>± 3.9e-07 | 3.660e-06<br>± 2.4e-07 | 3.795e-06<br>± 2.4e-07 | 4.167e-06<br>± 5.6e-07 | 4.189e-06 | 0.5%    |
|                      | 5            | 1.446e-05<br>± 5.4e-07 | 1.388e-05<br>± 1.9e-06 | 1.414e-05<br>± 5.1e-07 | 1.379e-05<br>± 5.3e-07 | 1.532e-05<br>± 5.7e-07 | 1.517e-05<br>± 4.6e-07 | 1.450e-05<br>± 6.7e-07 | 1.415e-05 | -2.4%   |

**Supplemental Table 8.** OpenDose electron SAFs ( $kg^{-1}$ ) for the model ICRP 110 adult female, the source Liver and target Spleen, Thyroid and Urinary Bladder Wall. SAFs are given for a selection of different Monte Carlo codes and the last 2 columns compare the mean over all available OpenDose data to ICRP 133 data.
